# Supplementary material for: Malonyl/Acetyltransferase (MAT) Knockout Decreases Triacylglycerol and Medium-Chain Fatty Acid Contents in Goat Mammary Epithelial Cells
Source: MDPI journal article supplement (doi:10.3390/foods11091291), 2022-04-29
Supplement: s1 [file s1]

Supplemental Table S1. Characteristics of Primers Used in the RT-qPCR Reaction

| Gene name      | Sense Primer<br>(5'–3')    | Anti-Sense Primer<br>(5'–3') | size<br>(bp) |
|----------------|----------------------------|------------------------------|--------------|
| <i>ACC</i>     | F: CTCCAACCTCAACCACTACGG   | R: GGGGAATCACAGAAGCAGCC      | 171          |
| <i>AGPAT6</i>  | F: AAGCAAGTTGCCCATCCTCA    | R: AAAGTGTGGCTCCAATTCGA      | 101          |
| <i>ATGL</i>    | F: GGAGCTTATCCAGGCCAATG    | R: TGCGGGCAGATGTCACTCT       | 180          |
| <i>DGAT1</i>   | F: CCACTGGGACCTGAGGTGTC    | R: GCATCACCACACACCAATTCA     | 101          |
| <i>DGAT2</i>   | F: CATGTACACATTCTGCACCGATT | R: TGACCTCCTGCCACCTTTCT      | 100          |
| <i>FASN</i>    | F: GGGCTCCACCACCGTGTTC     | R: GCTCTGCTGGGCCTGCAGCTG     | 226          |
| <i>GAPDH</i>   | F: GCAAGTTCCACGGCACAG      | R: GGTTCACGCCCATCACA         | 249          |
| <i>GPAM</i>    | F: ATTGACCCTTGGCACGATAG    | R: AACAGCACCTTCCCACAAAG      | 188          |
| <i>LXRα</i>    | F: CATCAACCCCATCTTCGAGTT   | R: CAGGGCCTCCACATATGTGT      | 163          |
| <i>MAT</i>     | F: ATGGCGGCTGTAGGCTTGAC    | R: GCACCTCCTTGGCGAACACG      | 169          |
| <i>PPARγ</i>   | F: CCTTCACCACCGTTGACTTCT   | R: GATACAGGCTCCACTTTGATTGC   | 145          |
| <i>SCD1</i>    | F : CCATCGCCTGTGGAGTCAC    | R: GTCGGATAAATCTAGCGTAGCA    | 256          |
| <i>SREBP1α</i> | F: CTGCTGACCGACATAGAAGACAT | R: GTAGGGCGGGTCAAACAGG       | 81           |
| <i>TIP47</i>   | F: GGTGGAGGGTCAGGAGAAA     | R: TCACGGAACATGGCGAGT        | 123          |
| <i>UXT</i>     | F: TGTGGCCCTTGGAATATGGTT   | R: GGTGTGCTGCTGAGCTCTGTG     | 101          |
| <i>XDH</i>     | F: GATCATCCACTTTTCTGCCAATG | R: CCTCGTCTTGGTGCTTCAA       | 100          |

Supplemental Table S2. Amplification primer of sgRNA6 target site sequence

| target sites | The first primer                                    | length bp | The second primer                                   | length bp |
|--------------|-----------------------------------------------------|-----------|-----------------------------------------------------|-----------|
| ON           | F: CAGCAGCCATGCCCTTC<br>R: CGTCGGCATAGGCACAGG       | 587       | F: AGGTGCCAACCAGCAAGCG<br>R: TGGGAACAGGATGGGTCAGG   | 415       |
| OT1          | F: TGTAGTCCATCAGGCTCTT<br>R: GCCCTGCCCAATAAAG       | 661       | F: AGTTGCCATTTCTTCCT<br>R: AGAATCCCAGCAGCAT         | 513       |
| OT2          | F: GTCCGTTACCTCCCAAGTA<br>R: ATCCCACCTCCAGCACCTA    | 645       | F: GACCCAGAAGTGGTCATCCC<br>R: CCCACCTCCAGCACCTACA   | 576       |
| OT3          | F: GGGAGTAAACAACCGAAGAG<br>R: GGGTAGCGATGCCTGTG     | 696       | F: TTATTCGGAGCAGCAGTTT<br>R: AGCGGAACCTGGCACA       | 421       |
| OT4          | F: GGAGCCAGTTGTGAATG<br>R: GGAGACAGCCGTGAAG         | 649       | F: GTGAATGGGATTTGTTTG<br>R: TGGACATTGCCTGAAGT       | 491       |
| OT5          | F: GGAGGGCAAGATAGGC<br>R: AGACCAGCAACCCAAGA         | 633       | F: GGGAAAGGAGACCATAAA<br>R: AGACCAGCAACCCAAGA       | 497       |
| OT6          | F: CCGGTGGACAGGGAAAGGA<br>R: TAGGAGGCGGGACTGTGGAG   | 661       | F: GGTGGACAGGGAAAGGAGAC<br>R: GCTGACTGATGCGTGGGTAT  | 519       |
| OT7          | F: CTCGCTTCTGCGTCTTCA<br>R: GCCATCACATTACCTATCCCT   | 717       | F: GCTGCGGGATGTTGTGC<br>R: GCCTATGTTGGGTGCTGA       | 532       |
| OT8          | F: GGGCAAGGCACGAGTGAGGT<br>R: GCTGGGTGAGAACAGGAGCAG | 648       | F: CACGAGTGAGGTCTCTTTCCC<br>R: GCATGATGTTCTCGGGCTTG | 554       |
| OT9          | F: GGGCAGCACTCATCAC<br>R: AACCAGGTCCTAACCAAC        | 662       | F: CTCTGGAAGCGAAGTGC<br>R: AACCAGGTCCTAACCAACT      | 539       |

Supplemental Table S3. Physicochemical properties of knockout genotypes.

|                            | WT     | No.2-1 | No.2-2 | No.5   | No.6-1 | No.6-2 |
|----------------------------|--------|--------|--------|--------|--------|--------|
| Number of bases missing    | -0     | -2     | -57    | -8     | -4     | -2     |
| Theoretical value of PI    | 5.83   | 11.13  | 5.82   | 10.59  | 11.77  | 10.93  |
| Coefficient of instability | 53.35  | 58.25  | 53.96  | 59.73  | 98.53  | 60.51  |
| Coefficient of fat         | 102.02 | 67.98  | 99.45  | 65.89  | 41.93  | 67.29  |
| Total mean hydrophilicity  | 0.106  | -0.691 | 0.088  | -0.745 | -0.483 | -0.708 |
